# Supplementary material for: Defect engineering in the MA2Z4 monolayer family for enhancing the hydrogen evolution reaction: first-principles calculations
Source: Royal Society of Chemistry journal article supplement (doi:10.1039/d2se01389d), 2022-11-14
Supplement: d2se01389d1.pdf [file d2se01389d1.pdf]

**Table S1**-The optimized geometric and electronic structure parameters of  $MA_2Z_4$  monolayer including A-Z ( $d_1$ ,  $d_2$ ) and M-Z ( $d_3$ ) bond lengths; A-Z-A ( $\theta_1$ ), Z-A-Z ( $\theta_2$ ), and Z-M-Z ( $\theta_3$ ,  $\theta_4$ ) angles.

| Structure                         | $d_1$ (Å) | $d_2$ (Å) | $d_3$ (Å) | $\theta_1$ (°) | $\theta_2$ (°) | $\theta_3$ (°) | $\theta_4$ (°) |
|-----------------------------------|-----------|-----------|-----------|----------------|----------------|----------------|----------------|
| MoSi <sub>2</sub> N <sub>4</sub>  | 1.75      | 1.74      | 2.09      | 111.96         | 106.82         | 87.85          | 73.54          |
| MoSi <sub>2</sub> P <sub>4</sub>  | 2.24      | 2.23      | 2.45      | 100.71         | 117.20         | 89.73          | 70.91          |
| MoSi <sub>2</sub> As <sub>4</sub> | 2.35      | 2.33      | 2.55      | 98.97          | 118.60         | 89.08          | 71.83          |
| MoGe <sub>2</sub> N <sub>4</sub>  | 1.86      | 1.89      | 2.12      | 108.74         | 110.22         | 90.73          | 69.50          |
| MoGe <sub>2</sub> P <sub>4</sub>  | 2.32      | 2.32      | 2.46      | 99.12          | 118.51         | 91.46          | 68.48          |
| MoGe <sub>2</sub> As <sub>4</sub> | 2.43      | 2.43      | 2.57      | 98.04          | 119.35         | 91.02          | 69.05          |
| WSi <sub>2</sub> N <sub>4</sub>   | 1.75      | 1.74      | 2.09      | 111.99         | 106.82         | 87.74          | 73.71          |
| WSi <sub>2</sub> P <sub>4</sub>   | 2.24      | 2.23      | 2.45      | 100.96         | 117.05         | 89.94          | 70.61          |
| WSi <sub>2</sub> As <sub>4</sub>  | 2.36      | 2.35      | 2.55      | 99.24          | 118.60         | 89.33          | 71.22          |
| WGe <sub>2</sub> N <sub>4</sub>   | 1.86      | 1.89      | 2.13      | 108.99         | 109.90         | 90.82          | 69.35          |
| WGe <sub>2</sub> P <sub>4</sub>   | 3.34      | 5.61      | 3.90      | 64.25          | 142.12         | 54.15          | 116.60         |
| WGe <sub>2</sub> As <sub>4</sub>  | 2.44      | 2.46      | 2.59      | 98.46          | 119.01         | 91.30          | 68.68          |
| VSi <sub>2</sub> N <sub>4</sub>   | 1.73      | 1.74      | 2.02      | 111.12         | 107.81         | 90.26          | 70.17          |
| VSi <sub>2</sub> P <sub>4</sub>   | 2.25      | 2.22      | 2.41      | 101.47         | 116.58         | 92.16          | 67.44          |
| VSi <sub>2</sub> As <sub>4</sub>  | 2.35      | 2.34      | 2.52      | 99.17          | 118.45         | 90.77          | 69.44          |
| VGe <sub>2</sub> N <sub>4</sub>   | 1.85      | 1.89      | 2.06      | 107.83         | 111.07         | 93.28          | 65.82          |
| VGe <sub>2</sub> P <sub>4</sub>   | 2.32      | 2.34      | 2.43      | 99.43          | 118.35         | 93.86          | 64.99          |
| VGe <sub>2</sub> As <sub>4</sub>  | 2.43      | 2.44      | 2.53      | 97.99          | 119.39         | 92.62          | 66.79          |

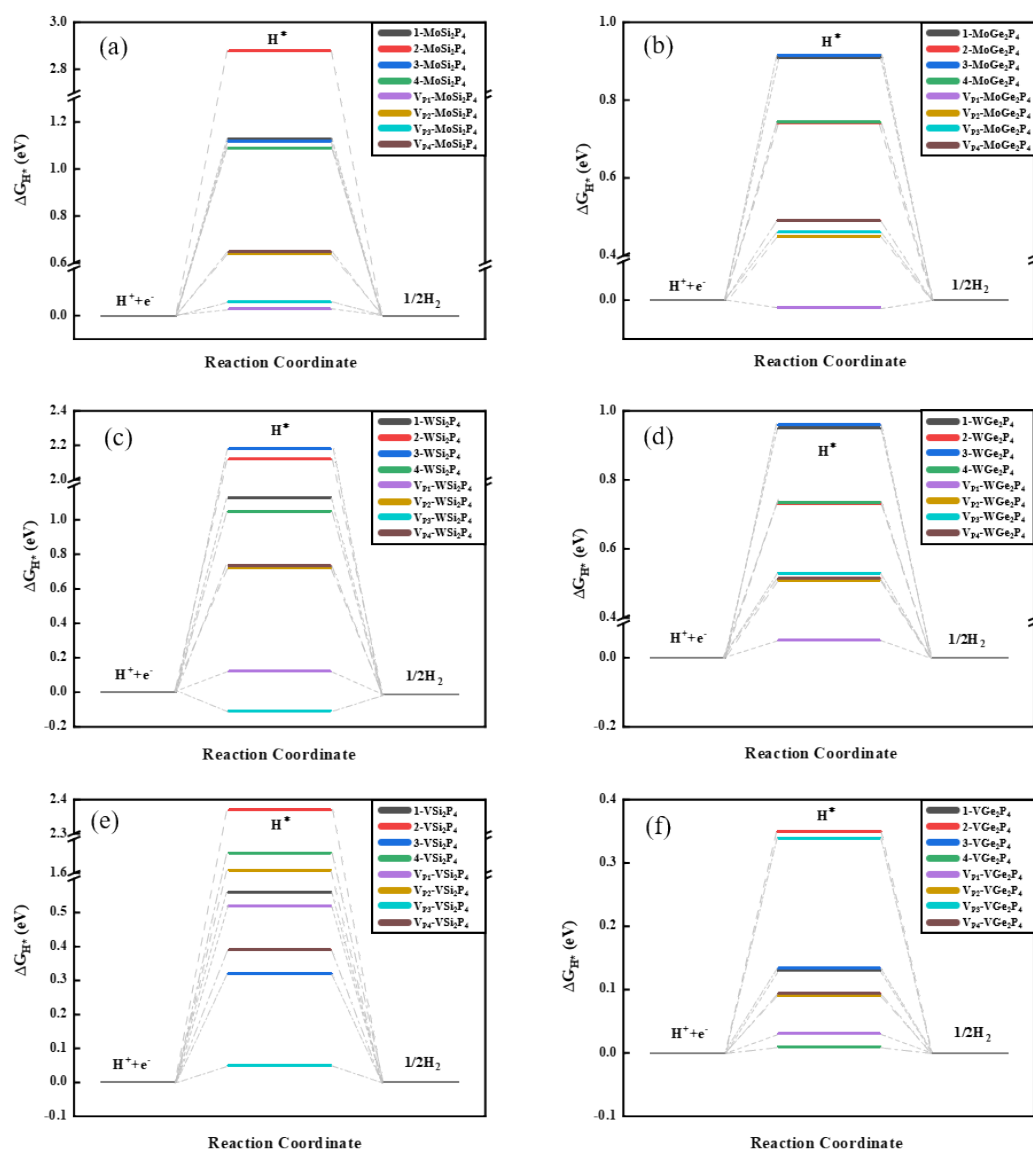

**Figure S1.** The Gibbs free energy of (a)  $MoSi_2P_4$ , (b)  $WSi_2P_4$ , (c)  $VSi_2P_4$ , (d)  $MoGe_2P_4$ , (e)  $WGe_2P_4$ , and (f)  $VGe_2P_4$  for intrinsic on site 1-4 and the Gibbs free energy of them for hydrogen evolution after  $V_p$  on site1-4.
